# Supplementary material for: Transcription factor Nrf1 regulates proteotoxic stress-induced autophagy
Source: PubMed Central journal article supplement (PMC11040505; doi:10.1083/jcb.202306150), 2024-04-24

# Source Data for Figure 1C

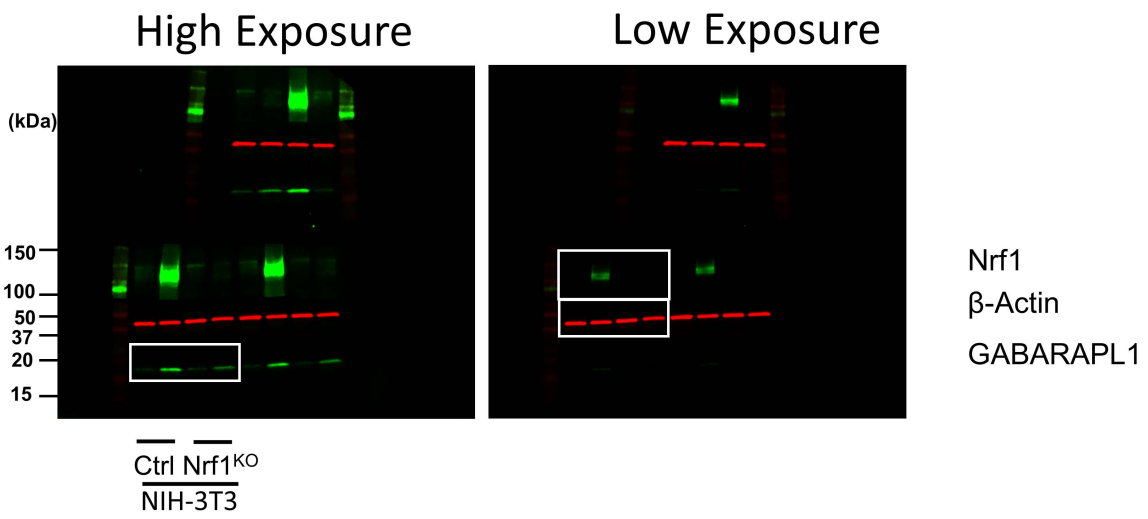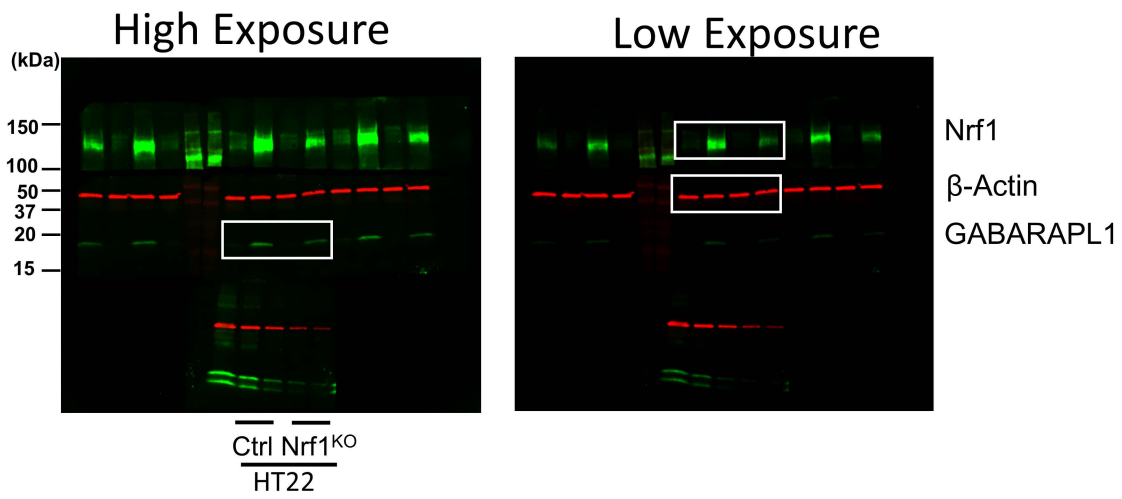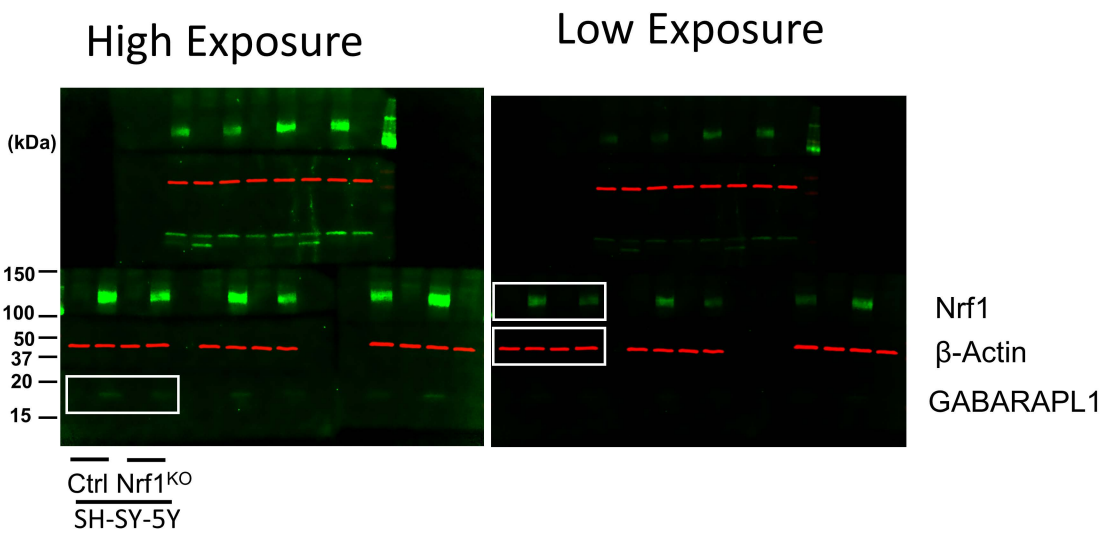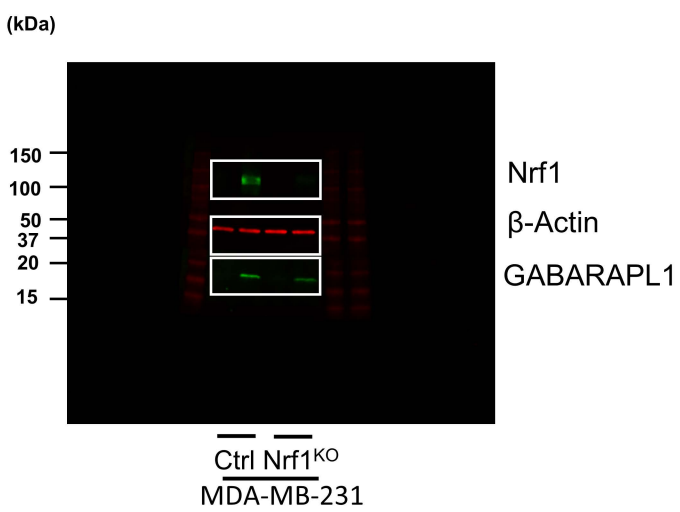

# Source Data for Figure 1E

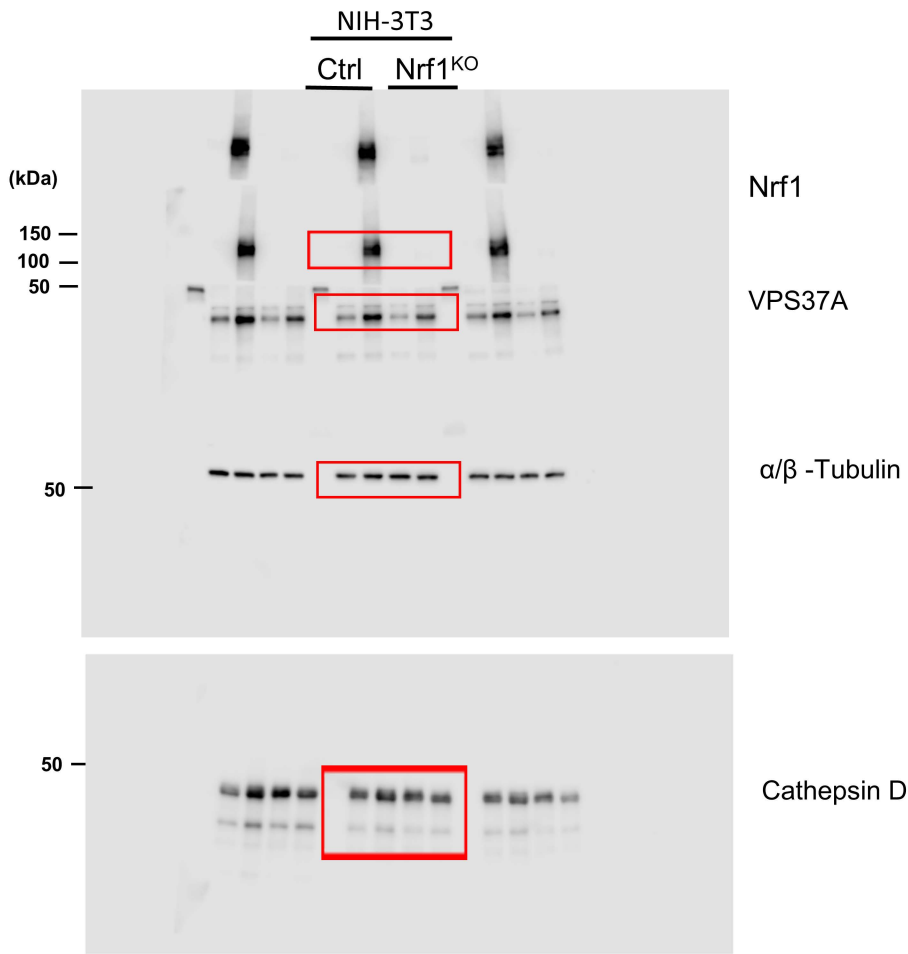

## High Exposure

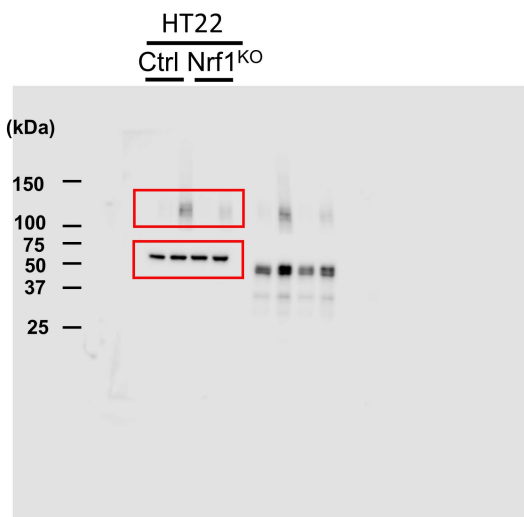

## Low Exposure

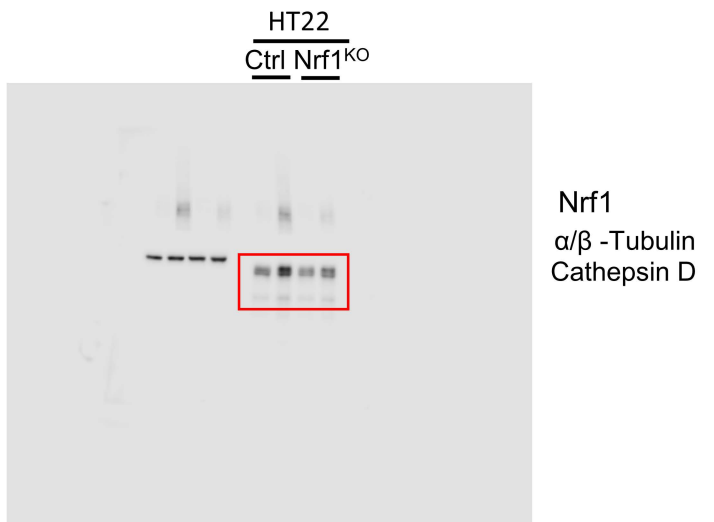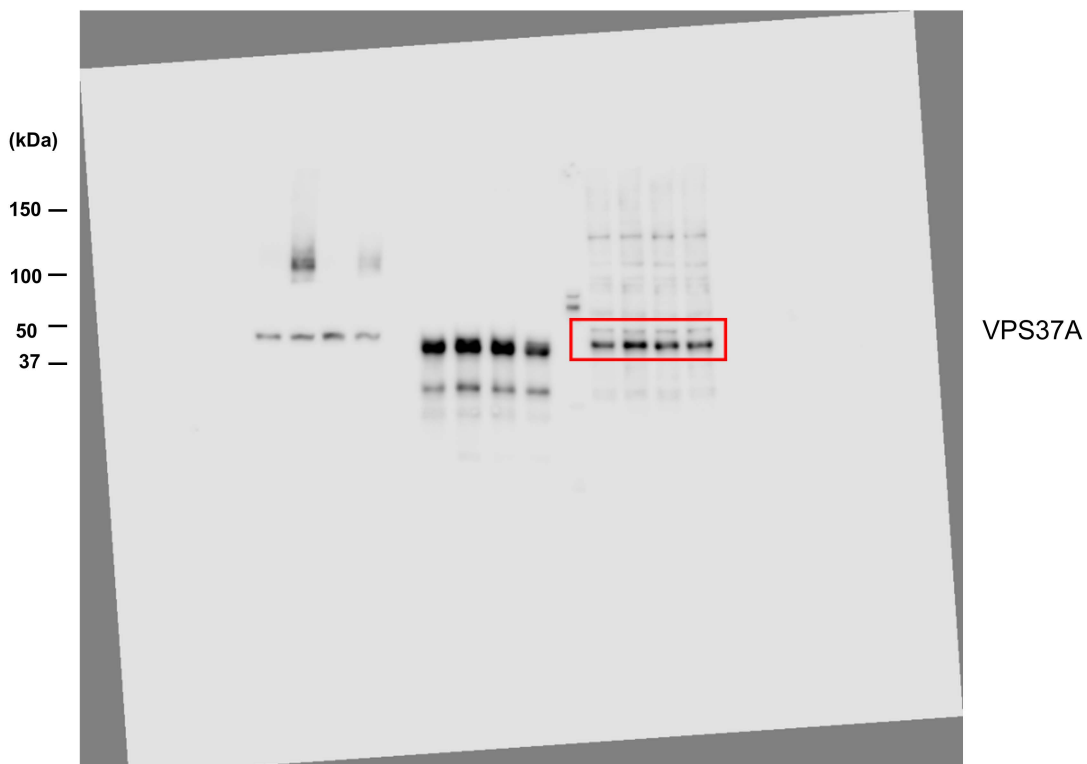

Supplement: JCB_202306150_SourceDataF1.pdf [file JCB_202306150_SourceDataF1.pdf]
