# Supplementary material for: Transcription factor Nrf1 regulates proteotoxic stress-induced autophagy
Source: PubMed Central journal article supplement (PMC11040505; doi:10.1083/jcb.202306150), 2024-04-24

# Source Data for Figure 6D

## High exposure

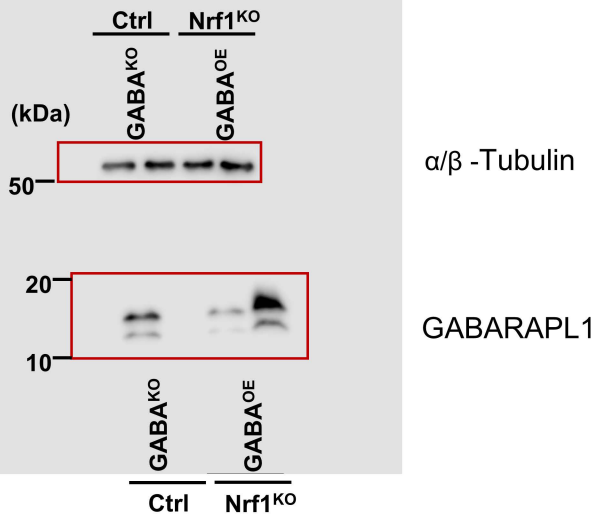

## Low exposure

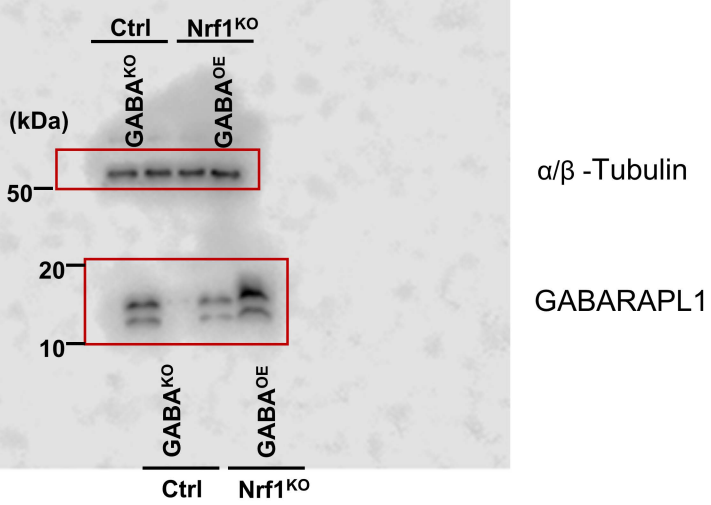

# Source Data for Figure 6E

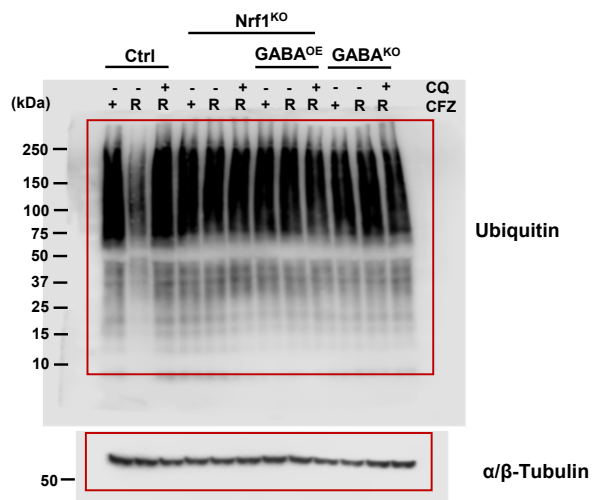

Supplement: JCB_202306150_SourceDataF6.pdf [file JCB_202306150_SourceDataF6.pdf]
