# Supplementary material for: Transcription factor Nrf1 regulates proteotoxic stress-induced autophagy
Source: PubMed Central journal article supplement (PMC11040505; doi:10.1083/jcb.202306150), 2024-04-24

Source Data for Figure 8C

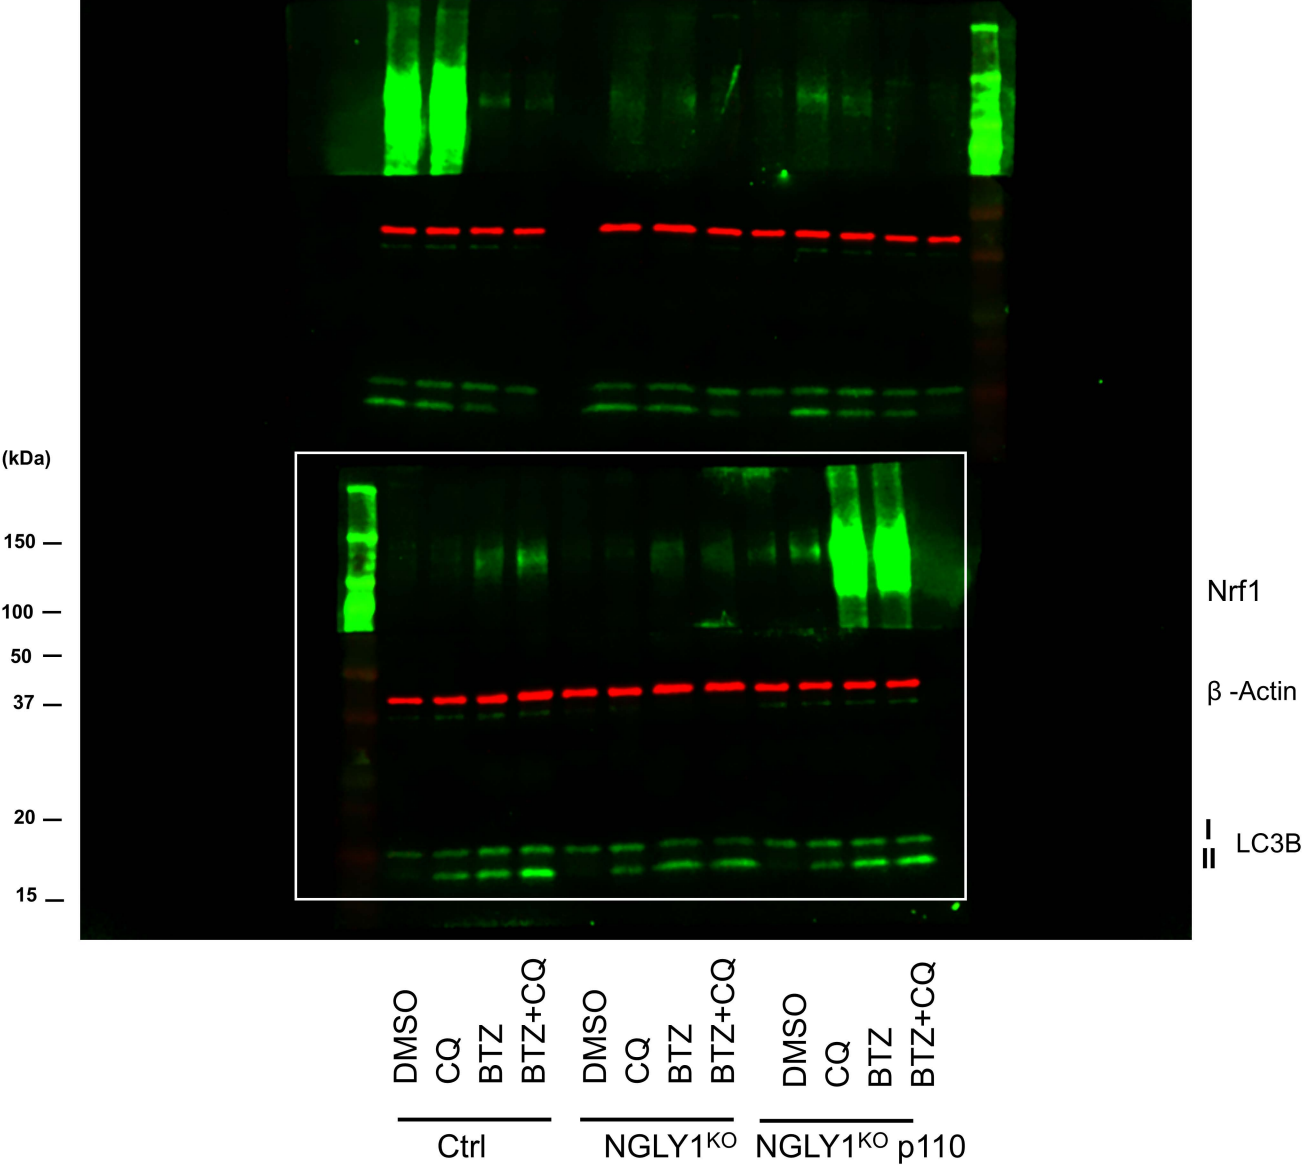

# Source Data for Figure 8E

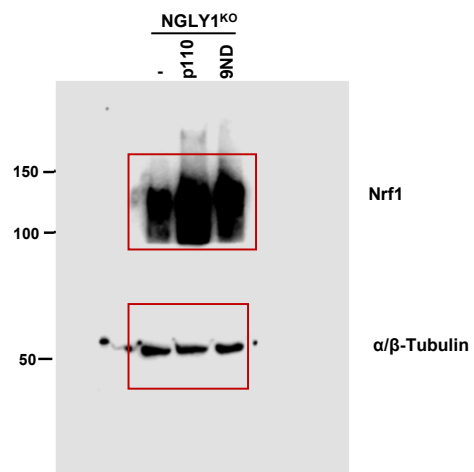

Source Data for Figure 8F

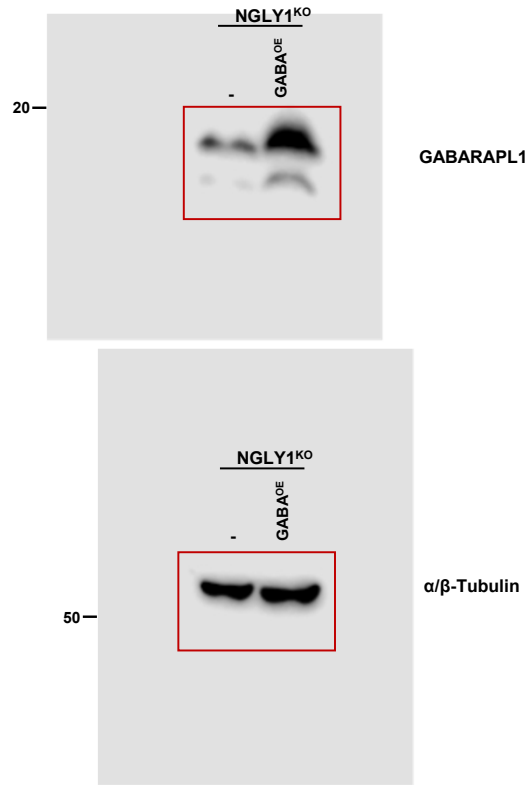

# Source Data for Figure 8G

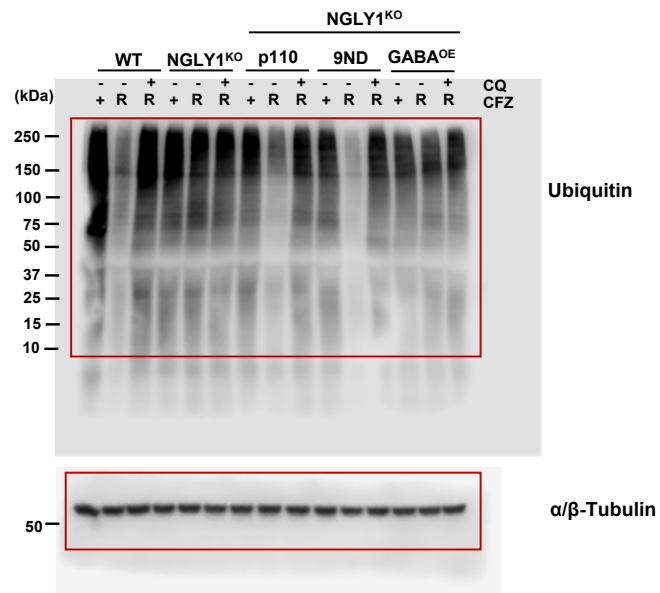

Supplement: JCB_202306150_SourceDataF8.pdf [file JCB_202306150_SourceDataF8.pdf]
