# Supplementary material for: Transcription factor Nrf1 regulates proteotoxic stress-induced autophagy
Source: PubMed Central journal article supplement (PMC11040505; doi:10.1083/jcb.202306150), 2024-04-24

Source Data for Figure S4

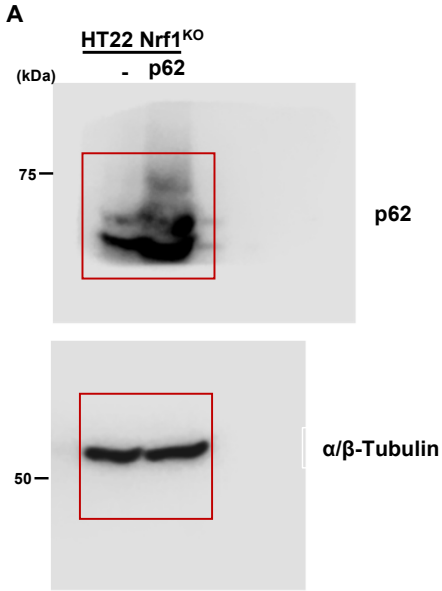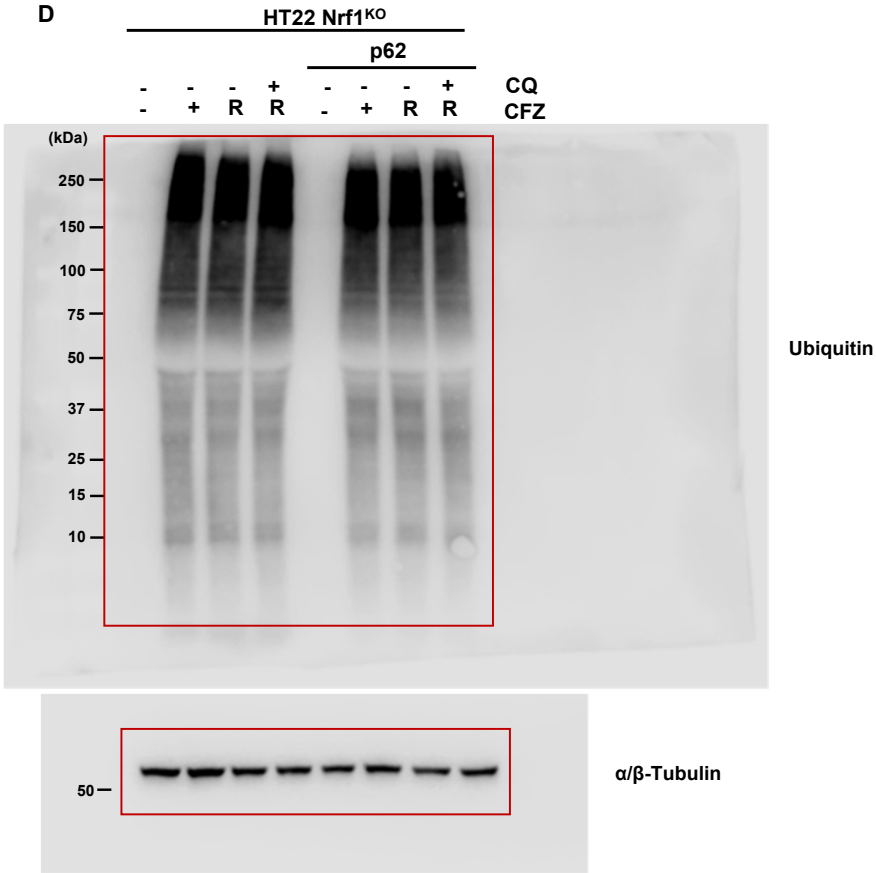

Supplement: JCB_202306150_SourceDataFS4.pdf [file JCB_202306150_SourceDataFS4.pdf]
